# Supplementary material
Source: publisher site journal article supplement (https://www.kjim.org/upload/media/kjim-2025-171-Supplementary-Table-7.pdf)
Supplement: Supplementary file 1 [file kjim-2025-171-Supplementary-Table-7.pdf]

**Supplementary Table 7. Stratification analysis of the incident risk of inflammatory liver disease following zoster vaccination in the propensity score-matched cohort**

| Inflammatory liver disease           | Events, n (%) | Incidence rate <sup>b)</sup> | aHR (95% CI)                      |                                   |
|--------------------------------------|---------------|------------------------------|-----------------------------------|-----------------------------------|
|                                      |               |                              | Model 1 <sup>c)</sup>             | Model 2 <sup>d)</sup>             |
| Sex                                  |               |                              |                                   |                                   |
| Male                                 |               |                              |                                   |                                   |
| Unvaccinated                         | 19,454 (6.12) | 4.94                         | 1.0 (reference)                   | 1.0 (reference)                   |
| Vaccinated                           | 15,705 (4.88) | 4.40                         | 0.86 (0.84 to 0.88) <sup>e)</sup> | 0.85 (0.83 to 0.87) <sup>e)</sup> |
| Female                               |               |                              |                                   |                                   |
| Unvaccinated                         | 24,392 (5.90) | 6.20                         | 1.0 (reference)                   | 1.0 (reference)                   |
| Vaccinated                           | 20,797 (5.08) | 5.83                         | 0.89 (0.87 to 0.91) <sup>e)</sup> | 0.89 (0.87 to 0.90) <sup>e)</sup> |
| Age (yr)                             |               |                              |                                   |                                   |
| < 60                                 |               |                              |                                   |                                   |
| Unvaccinated                         | 16,365 (8.41) | 4.16                         | 1.0 (reference)                   | 1.0 (reference)                   |
| Vaccinated                           | 13,248 (6.74) | 3.71                         | 0.83 (0.81 to 0.85) <sup>e)</sup> | 0.82 (0.80 to 0.84) <sup>e)</sup> |
| ≥ 60                                 |               |                              |                                   |                                   |
| Unvaccinated                         | 27,481 (5.12) | 6.98                         | 1.0 (reference)                   | 1.0 (reference)                   |
| Vaccinated                           | 23,254 (4.35) | 6.52                         | 0.90 (0.89 to 0.92) <sup>e)</sup> | 0.90 (0.88 to 0.92) <sup>e)</sup> |
| Region of residence                  |               |                              |                                   |                                   |
| Urban                                |               |                              |                                   |                                   |
| Unvaccinated                         | 21,315 (6.28) | 5.41                         | 1.0 (reference)                   | 1.0 (reference)                   |
| Vaccinated                           | 18,044 (5.32) | 5.06                         | 0.88 (0.87 to 0.90) <sup>e)</sup> | 0.88 (0.86 to 0.90) <sup>e)</sup> |
| Rural                                |               |                              |                                   |                                   |
| Unvaccinated                         | 22,531 (5.75) | 5.72                         | 1.0 (reference)                   | 1.0 (reference)                   |
| Vaccinated                           | 18,458 (4.71) | 5.17                         | 0.87 (0.85 to 0.89) <sup>e)</sup> | 0.86 (0.85 to 0.88) <sup>e)</sup> |
| Household income                     |               |                              |                                   |                                   |
| Low (0th–39th percentile)            |               |                              |                                   |                                   |
| Unvaccinated                         | 13,365 (6.33) | 3.40                         | 1.0 (reference)                   | 1.0 (reference)                   |
| Vaccinated                           | 10,634 (5.06) | 2.98                         | 0.85 (0.83 to 0.87) <sup>e)</sup> | 0.84 (0.82 to 0.86) <sup>e)</sup> |
| Middle (40th–79th percentile)        |               |                              |                                   |                                   |
| Unvaccinated                         | 15,854 (5.99) | 4.03                         | 1.0 (reference)                   | 1.0 (reference)                   |
| Vaccinated                           | 13,020 (4.98) | 3.65                         | 0.88 (0.86 to 0.90) <sup>e)</sup> | 0.88 (0.86 to 0.90) <sup>e)</sup> |
| High (80th–100th percentile)         |               |                              |                                   |                                   |
| Unvaccinated                         | 14,627 (5.73) | 3.72                         | 1.0 (reference)                   | 1.0 (reference)                   |
| Vaccinated                           | 12,848 (4.96) | 3.60                         | 0.90 (0.88 to 0.92) <sup>e)</sup> | 0.89 (0.87 to 0.91) <sup>e)</sup> |
| Body mass index (kg/m <sup>2</sup> ) |               |                              |                                   |                                   |
| < 23.0                               |               |                              |                                   |                                   |
| Unvaccinated                         | 9,836 (5.14)  | 2.50                         | 1.0 (reference)                   | 1.0 (reference)                   |
| Vaccinated                           | 8,325 (4.35)  | 2.33                         | 0.89 (0.86 to 0.91) <sup>e)</sup> | 0.88 (0.86 to 0.91) <sup>e)</sup> |
| 23.0–24.9                            |               |                              |                                   |                                   |
| Unvaccinated                         | 11,499 (5.74) | 2.92                         | 1.0 (reference)                   | 1.0 (reference)                   |
| Vaccinated                           | 9,379 (4.71)  | 2.63                         | 0.87 (0.84 to 0.89) <sup>e)</sup> | 0.86 (0.84 to 0.88) <sup>e)</sup> |
| ≥ 25.0                               |               |                              |                                   |                                   |
| Unvaccinated                         | 22,511 (6.63) | 5.72                         | 1.0 (reference)                   | 1.0 (reference)                   |
| Vaccinated                           | 18,798 (5.52) | 5.27                         | 0.88 (0.86 to 0.89) <sup>e)</sup> | 0.87 (0.85 to 0.89) <sup>e)</sup> |

Supplementary Table 7. Continued

| Inflammatory liver disease                 | Events, n (%) | Incidence rate <sup>b)</sup> | aHR (95% CI)                      |                                   |
|--------------------------------------------|---------------|------------------------------|-----------------------------------|-----------------------------------|
|                                            |               |                              | Model 1 <sup>c)</sup>             | Model 2 <sup>d)</sup>             |
| Smoking status <sup>a)</sup>               |               |                              |                                   |                                   |
| Non-smoker                                 |               |                              |                                   |                                   |
| Unvaccinated                               | 29,682 (5.87) | 7.54                         | 1.0 (reference)                   | 1.0 (reference)                   |
| Vaccinated                                 | 24,925 (4.98) | 6.99                         | 0.88 (0.87 to 0.90) <sup>e)</sup> | 0.88 (0.87 to 0.90) <sup>e)</sup> |
| Smoker                                     |               |                              |                                   |                                   |
| Unvaccinated                               | 14,164 (6.27) | 3.60                         | 1.0 (reference)                   | 1.0 (reference)                   |
| Vaccinated                                 | 11,577 (5.03) | 3.25                         | 0.86 (0.84 to 0.88) <sup>e)</sup> | 0.85 (0.83 to 0.87) <sup>e)</sup> |
| Alcohol consumption (day per week)         |               |                              |                                   |                                   |
| < 1                                        |               |                              |                                   |                                   |
| Unvaccinated                               | 19,869 (4.90) | 5.05                         | 1.0 (reference)                   | 1.0 (reference)                   |
| Vaccinated                                 | 15,301 (3.79) | 4.29                         | 0.81 (0.80 to 0.83) <sup>e)</sup> | 0.81 (0.80 to 0.83) <sup>e)</sup> |
| 1–4                                        |               |                              |                                   |                                   |
| Unvaccinated                               | 22,952 (7.33) | 5.83                         | 1.0 (reference)                   | 1.0 (reference)                   |
| Vaccinated                                 | 20,330 (6.47) | 5.70                         | 0.92 (0.90 to 0.94) <sup>e)</sup> | 0.91 (0.90 to 0.93) <sup>e)</sup> |
| ≥ 5                                        |               |                              |                                   |                                   |
| Unvaccinated                               | 1,025 (8.49)  | 0.26                         | 1.0 (reference)                   | 1.0 (reference)                   |
| Vaccinated                                 | 871 (6.59)    | 0.24                         | 0.83 (0.76 to 0.91) <sup>e)</sup> | 0.83 (0.76 to 0.91) <sup>e)</sup> |
| Physical activity                          |               |                              |                                   |                                   |
| Insufficient physical activity             |               |                              |                                   |                                   |
| Unvaccinated                               | 33,613 (5.99) | 8.54                         | 1.0 (reference)                   | 1.0 (reference)                   |
| Vaccinated                                 | 27,820 (5.01) | 7.80                         | 0.88 (0.87 to 0.89) <sup>e)</sup> | 0.87 (0.86 to 0.89) <sup>e)</sup> |
| Sufficient physical activity               |               |                              |                                   |                                   |
| Unvaccinated                               | 10,233 (6.01) | 2.60                         | 1.0 (reference)                   | 1.0 (reference)                   |
| Vaccinated                                 | 8682 (4.95)   | 2.43                         | 0.87 (0.84 to 0.89) <sup>e)</sup> | 0.86 (0.84 to 0.89) <sup>e)</sup> |
| Medication use for coronary artery disease |               |                              |                                   |                                   |
| No                                         |               |                              |                                   |                                   |
| Unvaccinated                               | 42,306 (6.00) | 10.75                        | 1.0 (reference)                   | 1.0 (reference)                   |
| Vaccinated                                 | 35,242 (5.00) | 9.88                         | 0.88 (0.86 to 0.89) <sup>e)</sup> | 0.87 (0.86 to 0.88) <sup>e)</sup> |
| Yes                                        |               |                              |                                   |                                   |
| Unvaccinated                               | 1,540 (5.88)  | 0.39                         | 1.0 (reference)                   | 1.0 (reference)                   |
| Vaccinated                                 | 1,260 (4.87)  | 0.35                         | 0.87 (0.80 to 0.93) <sup>e)</sup> | 0.86 (0.80 to 0.93) <sup>e)</sup> |
| Medication use for hypertension            |               |                              |                                   |                                   |
| No                                         |               |                              |                                   |                                   |
| Unvaccinated                               | 29,083 (5.98) | 7.39                         | 1.0 (reference)                   | 1.0 (reference)                   |
| Vaccinated                                 | 23,618 (4.94) | 6.62                         | 0.88 (0.86 to 0.89) <sup>e)</sup> | 0.87 (0.86 to 0.89) <sup>e)</sup> |
| Yes                                        |               |                              |                                   |                                   |
| Unvaccinated                               | 14,763 (6.04) | 3.75                         | 1.0 (reference)                   | 1.0 (reference)                   |
| Vaccinated                                 | 12,884 (5.09) | 3.61                         | 0.87 (0.85 to 0.89) <sup>e)</sup> | 0.87 (0.85 to 0.89) <sup>e)</sup> |

Supplementary Table 7. Continued

| Inflammatory liver disease        | Events, n (%) | Incidence rate <sup>b)</sup> | aHR (95% CI)                      |                                   |
|-----------------------------------|---------------|------------------------------|-----------------------------------|-----------------------------------|
|                                   |               |                              | Model 1 <sup>c)</sup>             | Model 2 <sup>d)</sup>             |
| Medication use for diabetes       |               |                              |                                   |                                   |
| No                                |               |                              |                                   |                                   |
| Unvaccinated                      | 38,112 (6.01) | 9.68                         | 1.0 (reference)                   | 1.0 (reference)                   |
| Vaccinated                        | 31,517 (5.02) | 8.83                         | 0.88 (0.87 to 0.90) <sup>e)</sup> | 0.88 (0.86 to 0.89) <sup>e)</sup> |
| Yes                               |               |                              |                                   |                                   |
| Unvaccinated                      | 5,734 (5.94)  | 1.46                         | 1.0 (reference)                   | 1.0 (reference)                   |
| Vaccinated                        | 4,985 (4.84)  | 1.40                         | 0.83 (0.80 to 0.86) <sup>e)</sup> | 0.83 (0.80 to 0.87) <sup>e)</sup> |
| Medication use for hyperlipidemia |               |                              |                                   |                                   |
| No                                |               |                              |                                   |                                   |
| Unvaccinated                      | 37,056 (5.92) | 9.41                         | 1.0 (reference)                   | 1.0 (reference)                   |
| Vaccinated                        | 30,497 (4.92) | 8.55                         | 0.88 (0.87 to 0.89) <sup>e)</sup> | 0.88 (0.86 to 0.89) <sup>e)</sup> |
| Yes                               |               |                              |                                   |                                   |
| Unvaccinated                      | 6,790 (6.44)  | 1.72                         | 1.0 (reference)                   | 1.0 (reference)                   |
| Vaccinated                        | 6,005 (5.37)  | 1.68                         | 0.84 (0.82 to 0.87) <sup>e)</sup> | 0.84 (0.81 to 0.87) <sup>e)</sup> |

aHR, adjusted hazard ratio; CI, confidence interval.

<sup>a)</sup>Non-smoker indicates individuals who do not currently smoke.

<sup>b)</sup>Incidence rate expressed as per 1,000 person-years.

<sup>c)</sup>Models 1: adjusted for age (50–54, 55–59, 60–64, and ≥ 65 years) and sex.

<sup>d)</sup>Model 2: adjusted for age (50–54, 55–59, 60–64, and ≥ 65 years); sex; household income (low income, middle income, and high income); region of residence (urban and rural); Charlson comorbidity index (0, 1, and ≥ 2); obesity (underweight [ $< 18.5 \text{ kg/m}^2$ ], normal [ $18.5\text{--}22.9 \text{ kg/m}^2$ ], overweight [ $23.0\text{--}24.9 \text{ kg/m}^2$ ], and obese [ $\geq 25.0 \text{ kg/m}^2$ ]); blood pressure (systolic blood pressure  $< 140 \text{ mmHg}$  and diastolic blood pressure  $< 90 \text{ mmHg}$  and systolic blood pressure  $\geq 140 \text{ mmHg}$  or diastolic blood pressure  $\geq 90 \text{ mmHg}$ ); fasting blood glucose ( $< 100$  and  $\geq 100 \text{ mg/dL}$ ); glomerular filtration rate ( $< 60$ ,  $60\text{--}89$ , and  $\geq 90 \text{ mL/min/1.73 m}^2$ ); smoking status (non-, ex-, and current smoker); alcohol consumption (drinks;  $< 1$ ,  $1\text{--}2$ ,  $3\text{--}4$ , and  $\geq 5$  days per week); aerobic physical activity (sufficient and insufficient); and history of medication use for coronary artery disease, diabetes mellitus, dyslipidemia, and hypertension.

<sup>e)</sup>Significant differences ( $p < 0.05$ ).
